# Supplementary material for: CD47 Potentiates Inflammatory Response in Systemic Lupus Erythematosus
Source: MDPI journal article supplement (doi:10.3390/cells10051151), 2021-05-10
Supplement: s1 [file s1]

Supplementary Material

# CD47 Potentiates Inflammatory Response in Systemic Lupus Erythematosus

Jin Kyun Park <sup>1,2,†</sup>, Ye Ji Lee <sup>2,†</sup>, Ji Soo Park <sup>1</sup>, Eun Bong Lee <sup>1,2</sup>, and Yeong Wook Song <sup>1,2,\*</sup>

<sup>1</sup> Department of Molecular Medicine and Biopharmaceutical Sciences, Graduate School of Convergence Science and Technology and College of Medicine, Medical Research Center, Seoul National University, Seoul, Korea; jinkyunpark@snu.ac.kr (J.K.P.); vjisuev@gmail.com (J.S.P.); leb7616@snu.ac.kr (E.B.L.)

<sup>2</sup> Division of Rheumatology, Department of Internal Medicine, Seoul National University College of Medicine, Seoul, Korea; lyj901120@naver.com

\* Correspondence: ysong@snu.ac.kr; Tel: + 82-2-2072-4765

† Both authors contributed equally to work

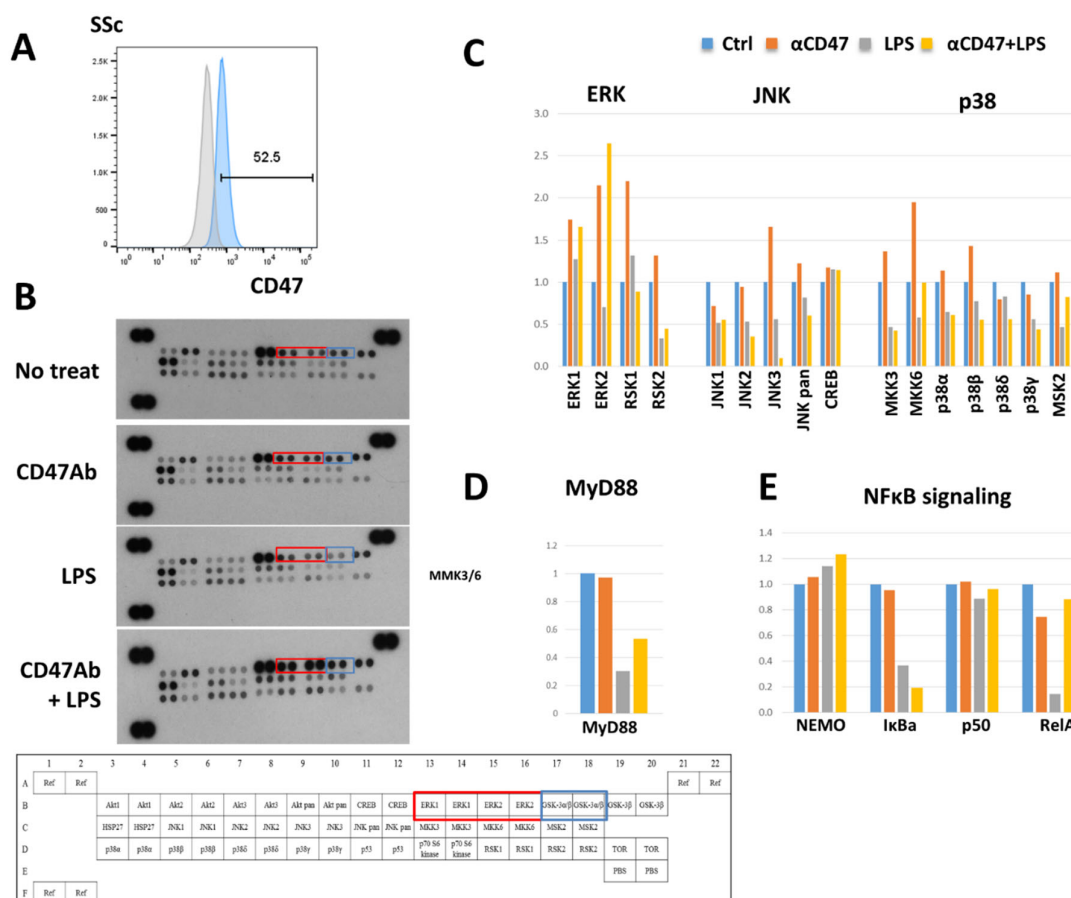

**Figure S1.** CD47 activation activates MAPK signaling. (A) Expression of CD47 on THP1 cells was examined by flow cytometry. (B,C) THP1 cells were treated with 1 µg/mL anti-CD47 antibody and/or 3 ng/mL LPS for 30 min and phospho-MAKP array was performed. (B) Image of phospho-MAKP-array blot with the array map (bottom panel) is shown. Phosphorylation of ERK (red rectangle) and GSK-3 (blue rectangle) is marked. (C) Densitometry analysis of the phospho-MAKP-array according to the 3 major arms of MAPK pathways (i.e., ERK, JNK, p38). (D,E) Densitometry analysis of the phospho-MyD88 and phospho-NFκB array after treatment with CD47 and/or LPS is shown. Phosphorylation is shown as fold change compared to no treatment. Ctrl, control; LPS, lipopolysaccharide; SSc, Side scatter.
